# 1 Social effects of territorial neighbours on the timing of spring 2 breeding in North American red squirrels

3

4 David N. Fisher<sup>1\*</sup>, Alastair J. Wilson<sup>2</sup>, Stan Boutin<sup>3</sup>, Ben Dantzer<sup>4,5</sup>, Jeffrey E. Lane<sup>6</sup>, David  
5 W. Coltman<sup>3</sup>, Jamie C. Gorrell<sup>7</sup>, and Andrew G. McAdam<sup>1</sup>

6 1. Department for Integrative Biology, University of Guelph, Guelph, Ontario N1G 2W1,  
7 Canada

8 2. Centre for Ecology and Conservation, University of Exeter, Penryn, Cornwall, TR10  
9 9FE, UK

10 3. Department of Biological Sciences, University of Alberta, Edmonton, Alberta T6G  
11 2E9, Canada

12 4. Department of Psychology, University of Michigan, Ann Arbor, Michigan 48109-  
13 1043, USA

14 5. Department of Ecology and Evolutionary Biology, University of Michigan, Ann Arbor,  
15 Michigan 48109-1043, USA

16 6. Department of Biology, University of Saskatchewan, Saskatoon, Saskatchewan S7N  
17 5E2, Canada

18 7. Biology Department, University of Vancouver Island, Nanaimo, British Columbia V9R  
19 5W4, Canada

20

21 \*corresponding author: [davidnfisher@hotmail.com](mailto:davidnfisher@hotmail.com)

22

## 23 Abstract

24 Organisms can affect one another's phenotypes when they socially interact. Indirect genetic  
25 effects occur when an individual's phenotype is affected by genes expressed in another  
26 individual. These heritable effects can enhance or reduce adaptive potential, thereby  
27 accelerating or reversing evolutionary change. Quantifying these social effects is therefore  
28 crucial for our understanding of evolution, yet estimates of indirect genetic effects in wild  
29 animals are limited to dyadic interactions. We estimated indirect phenotypic and genetic  
30 effects, and their covariance with direct effects, for the date of spring breeding in North  
31 American red squirrels (*Tamiasciurus hudsonicus*) living in an array of territories of varying  
32 spatial proximity. Additionally, we estimated variance parameters and the strength of  
33 selection at low and high population densities. Social effects of neighbours on the date of  
34 spring breeding were weak at low, but stronger at high population densities. Indirect  
35 phenotypic effects accounted for a larger amount of variation in the date of breeding than  
36 direct differences among-individuals, although the genetic component to these indirect

37 effects was not statistically significant. Nevertheless, the estimated effect size was large  
38 enough to suggest that indirect genetic effects could alter evolutionary change, resulting in  
39 less change at high densities despite stronger selection. Despite the difficulty in estimating  
40 them precisely, indirect genetic effects have clear potential to alter evolutionary trajectories  
41 in any natural systems where organisms interact.

42 **Key words:** evolution, indirect genetic effects, KRSP, selection, social interactions,  
43 *Tamiasciurus*

44

## 45 Introduction

46

47 An individual's phenotype is influenced by both its genotype and the environment it  
48 experiences. When organisms live in a social world, mating, competing and cooperating with  
49 conspecifics (Frank 2007), the environment they experience is partly made up of the  
50 phenotypes of other individuals. This can allow an individual to influence others, and if this  
51 trait has a genetic component, then a portion of any organism's phenotype will be influenced  
52 by the genes of those with whom it interacts (Griffing 1967). These are known as indirect  
53 genetic effects ("IGEs"), of which maternal genetic effects are a widely known example  
54 (Moore et al. 1997; Wolf et al. 1998; McAdam et al. 2014). With maternal genetic effects, the  
55 genes of a mother influence the traits of her offspring beyond those directly inherited (e.g. a  
56 mammal's genes affecting milk production may influence the growth rate of her offspring;  
57 Koch 1972; María et al. 1993). In the same way, the genes affecting hunting success of an  
58 individual (so a direct genetic effect, "DGE", for condition) in a pack-hunting species may  
59 influence the body condition of its pack mates (an IGE). Additionally, when competing for  
60 limited resources, the genes for resource acquisition of one individual are expected to  
61 negatively influence the resource acquisition, and so resource dependent traits, of  
62 individuals with which it competes (Wilson 2014). Therefore, IGEs can be expected in almost  
63 any system where conspecifics interact with each other (McAdam et al. 2014).

64 As IGEs are heritable by definition, they contribute additional heritable variation  
65 within a population alongside DGEs (Moore et al. 1997; Bijma and Wade 2008). Similar to a  
66 genetic correlation between any two traits (Lande 1979; Kirkpatrick 2009), an individual's  
67 own phenotype for some focal trait and its indirect effect on that trait expressed by  
68 neighbours can be genetically correlated (a DGE-IGE correlation). When IGEs are positively  
69 correlated with DGEs, which we would expect for the trait of hunting success in the pack-  
70 hunter example above, IGEs can enhance that trait's response to directional selection. This  
71 happens because the standard response of the focal trait to selection results in a correlated  
72 evolutionary change in the social environment. This in turn causes further change in focal

73 trait mean - in the same direction - through a plastic response to the social environment  
74 (Moore et al. 1997).

75 Conversely, if IGEs are negatively correlated with DGEs then the population  
76 response to selection can be reduced, removed, or even reversed (Bijma and Wade 2008;  
77 Wilson 2014). Negative correlations are expected for focal traits that are themselves  
78 dependent on the outcome of competition for limited resources (Wilson 2014). For instance,  
79 Wade (1976) observed a decrease in mean reproductive output across generations in flour  
80 beetles (*Tribolium castaneum*) that were under individual selection for *increased*  
81 reproduction. This was presumably due to a negative IGE-DGE correlation that caused each  
82 subsequent generation to be composed of individuals that more strongly suppressed the  
83 reproduction of others through competitive interactions. Similarly, Costa e Silva *et al.* (2013)  
84 observed a strong negative DGE-IGE covariance for diameter at breast height in Eucalyptus  
85 trees (*Eucalyptus globulus*). This meant that, despite tree growth rates being heritable in the  
86 traditional sense (i.e. subject to DGEs), the total heritable variation in the population was  
87 near zero, preventing a response to selection. Estimates of DGEs alone might, therefore,  
88 provide a poor measure of the potential for a trait to respond to natural selection, yet most  
89 estimates of response to selection or evolvability in the wild only consider DGEs (Houle  
90 1992). More specifically, to the extent to which resources are limited in nature, we might  
91 expect DGEs to consistently overestimate the adaptive potential of resource-dependent  
92 traits because of negatively covarying IGEs (Wilson 2014). As such, IGEs arising from  
93 competition represent one possible explanation for the “paradox of stasis”, in which natural  
94 selection on heritable traits often leads to stasis rather than evolutionary change (Merilä et  
95 al. 2001), yet IGEs are very rarely quantified in the wild.

96 To date, empirical studies of IGEs in animals have focused on scenarios in which  
97 within group interactions can be considered (approximately) uniform, and among-group  
98 interactions are absent. This allows IGEs to be estimated from the covariance between  
99 phenotypes of group mates, provided pedigree data spanning groups are available (Bijma  
100 2010a). This approach is well suited to dyadic interactions, but also to larger discrete groups  
101 ( $n > 2$ ) of captive animals, where all individuals within a pen are assumed to interact equally,  
102 but no interactions occur between individuals in different pens. It has now been applied in a  
103 variety of taxa, such as mussels (*Mytilus galloprovincialis*; Bricchette et al. 2001), flour beetles  
104 (*T. castaneum*; Ellen et al. 2016), Nile tilapia (*Oreochromis niloticus*; Khaw et al. 2016),  
105 domesticated chickens (*Gallus domesticus*; Muir 2005; Brinker et al. 2015) mink (*Neovison  
106 vison*; Alemu et al. 2014), and domestic rabbits (*Oryctolagus cuniculus*; Piles et al. 2017).  
107 This work has helped establish the importance of IGEs for trait evolution (see: Ellen *et al.*  
108 2014, for a review in livestock), and has led to growing interest in studying IGEs in wild  
109 populations.

110 Studies of IGEs in free-living animal populations, however, have thus far been  
111 confined to dyadic interactions. For example, Wilson *et al.* (2011) demonstrated that the  
112 tendency to win one-on-one fights in wild red deer (*Cervus elaphus*) is subject to both DGEs  
113 and IGEs that are perfectly *negatively* correlated, resulting in a total heritable variation of  
114 zero. This reconciles quantitative genetic predictions with a common sense approach that  
115 sees that the tendency to win cannot evolve at the population level, as each contest must  
116 always have one winner and one loser (see also: Wilson *et al.* 2009; Sartori and Mantovani  
117 2013). Other estimates for IGEs have focused on maternal genetic effects (McAdam and  
118 Boutin 2004; McFarlane *et al.* 2015) or influences of male partner on female bird laying  
119 dates (Brommer and Rattiste 2008; Caro *et al.* 2009; Teplitsky *et al.* 2010; Liedvogel *et al.*  
120 2012; Germain *et al.* 2016). Studies on social interactions in groups of wild animals larger  
121 than two are, however, absent.

122 While social processes in wild populations frequently involve interactions among  
123 more than two individuals, it is often problematic to identify and define discrete groups where  
124  $n > 2$ . In many cases an individual will interact with multiple conspecifics, but not all at equal  
125 intensity. Some interactions are frequent or strong while other interactions are brief or weak  
126 (Lusseau *et al.* 2003; Croft *et al.* 2004, 2008). One possibility is that organisms interacting in  
127 larger groups have generally weaker indirect effects on each of their group mates, as a  
128 consequence of their phenotype being “diluted” among more group members (Muir 2005;  
129 Hadfield and Wilson 2007; Bijma 2010b). However, within a continuous population (*i.e.* one  
130 in which distinct groups cannot be identified) it seems likely the net effect of one individual  
131 on the phenotype of any other may depend on distance or other factors (*e.g.* time  
132 associating) that mediate interaction intensity or frequency (Muir 2005; Cappa and Cantet  
133 2008). To model these situations, variation in interaction strengths can be incorporated as  
134 “dilution” or “intensity of competition” factors in IGE models (Muir 2005; Cappa and Cantet  
135 2008; Bijma 2010b). Here we refer to “intensity of association” factors, since social  
136 interactions are not always competitive. This approach has proven useful in forestry genetics  
137 to estimate DGEs, IGEs, and their covariance, on growth traits in Eucalyptus trees (Costa e  
138 Silva *et al.* 2013, 2017). In this context, the inverse of the distance between each pair of  
139 trees was used as the intensity of association factor. The important premise here is that  
140 each focal individual has a potential indirect genetic effect on the phenotype of all its social  
141 partners, but the degree to which each partner experiences that effect is contingent on its  
142 distance from the focal individual. Incorporating intensity of association factors should be  
143 equally useful for animal focused IGE models, as allows us to account for animals interacting  
144 with multiple different individuals, in groups of varying sizes, and with different individuals at  
145 different strengths; a realistic representation of social interactions in the natural world (Fisher  
146 and McAdam 2017).

147 Here we used intensity of association factors to model IGEs amongst multiple  
148 neighbours for the first time in a wild animal. We applied this framework to a population of  
149 North American red squirrels (*Tamiasciurus hudsonicus*, hereafter “red squirrels”) that have  
150 been continuously studied since 1987. We looked at a resource-dependent, but also  
151 heritable ( $h^2 = 0.14$ ; Lane et al. 2018) life-history trait: parturition date (the date in the spring  
152 on which a female squirrel gives birth to a litter; Réale et al. 2003; Boutin et al. 2006; Kerr et  
153 al. 2007; Lane et al. 2018), which had the potential to show IGEs. Red squirrels of both  
154 sexes in this population live on individual exclusive territories based around a central cache  
155 of white spruce (*Picea glauca*) cones called a “midden”. The seeds from stored spruce  
156 cones represents their main food source during reproduction in the spring (Fletcher et al.  
157 2013a). Individuals make territorial calls (“rattles”) to delineate territory boundaries (Lair  
158 1990) and deter intruders (Siracusa et al. 2017) from stealing cached resources (Gerhardt  
159 2005; Donald and Boutin 2011). Previous analyses have shown that selection favours earlier  
160 parturition dates (Réale et al. 2003), while a food supplementation experiment advanced the  
161 timing of spring breeding (Kerr et al. 2007). Note, however, that females can upregulate  
162 reproduction prior to a resource pulse (Boutin et al. 2006), and so typically are reproducing  
163 below capacity (Boutin et al. 2013), so may not be absolutely food limited. Still, if neighbours  
164 compete for food resources, we expect superior competitors to have access to more food  
165 and breed earlier. Conversely, competitively inferior individuals are expected to acquire less  
166 food and so breed later.

167 Population density is a key demographic parameter with which we expect IGEs to  
168 vary. Selection on birth dates is particularly strong in years of high density (Williams et al.  
169 2014; Fisher et al. 2017; although not found in Dantzer et al. 2013). Furthermore, red  
170 squirrels respond behaviourally to both real and perceived increases in density (Dantzer et  
171 al. 2012), while mothers adaptively increase the growth rates of their offspring under high  
172 density conditions (Dantzer et al. 2013). Taken together, these findings are consistent with  
173 the expectation that, all else being equal, high density means increased competition.

174

175 In light of the above, we had the following aims and predictions:

- 176 1) We expected individuals to have indirect effects on the parturition dates of their  
177 neighbours, and that the covariance between direct and indirect effects would be  
178 negative. That is, superior competitors will breed earlier and cause their neighbours to  
179 breed later (following Costa e Silva et al. 2013; see also: Piles et al. 2017).
- 180 2) Parturition dates depend on resource acquisition and possess direct genetic variance,  
181 so we expected the indirect effects to possess genetic variance (i.e. to be an IGE;  
182 McAdam et al. 2014; Wilson 2014).

- 183 3) Increased competition in years of high density should result in stronger indirect effects  
184 in high-density years, both in the magnitude of the indirect effects and the strength of  
185 the covariance.
- 186 4) Finally, we applied the equations of Bijma and Wade (2008) and Costa e Silva et al.  
187 (2013) to predict a response to selection in the presence of IGEs, across the whole  
188 dataset and at low and high densities separately. This allowed us to assess how IGEs  
189 would likely affect evolutionary responses to selection in this system.

190

## 191 Methods

192

### 193 Data collection

194 All data were collected as part of the Kluane Red Squirrel Project in the southwest Yukon,  
195 Canada. Since 1987 we have monitored two adjacent and unmanipulated 40 ha. study areas  
196 ("Kloo" and "Sulphur"), bisected by the Alaska highway. Red squirrels of both sexes defend  
197 exclusive resource-based territories of around 0.3 ha (LaMontagne et al. 2013), centred  
198 around a midden, an aggregation of discarded white spruce cone scales underneath which  
199 red squirrels cache intact white spruce cones. Each study area is staked at 30m intervals in  
200 a grid system and we recorded the x- and y-coordinates of the centre of each midden (to the  
201 nearest tenth of a coordinate point, giving distances to the nearest 3m). In the spring of each  
202 year we live trapped (Tomahawk Live Trap, Tomahawk, WI, USA) new individuals and gave  
203 them unique ear tags in each ear. We also located females (based on vocalizations at  
204 known and new territory locations), monitored them for signs of pregnancy and ear tagged  
205 their pups once they were born. Based on the previously identified stages of female  
206 pregnancy and the body mass of the pups once they were located, we then estimated the  
207 female's parturition date. We analyse this date as the number of days since the 1<sup>st</sup> January  
208 in the calendar year. We also conducted censuses twice yearly (once in spring, once in  
209 autumn) using complete enumeration to ascertain the location of all individuals holding a  
210 territory, and so estimate population density. See McAdam *et al.* (2007) for further details on  
211 the study system.

212 Red squirrels collect food throughout the summer and autumn, cache it in their  
213 middens and rely on it to survive over winter (Fletcher et al. 2013a). The number of cached  
214 cones is positively associated with overwinter survival (juveniles: Larivée et al. 2010;  
215 juveniles and adults: LaMontagne et al. 2013). Squirrels primarily forage close to their  
216 midden, with occasional forays further afield, including small amounts of theft from other red  
217 squirrels' hoards (Donald and Boutin 2011). We define the individuals a red squirrel  
218 potentially competes with as its  $n$  nearest neighbours ( $n$  was set at 6 for the majority of this



219 analysis, but see below for explorations with different numbers of neighbours). We defined  
220 neighbourhoods and population densities based on our autumn census (August) rather than  
221 our spring census (May), because autumn is when squirrels are potentially competing for  
222 resources to hoard, and conception occurs well before May in most years. Gestation varies  
223 little around 35 days (Lair 1985), hence parturition dates cannot be influenced by conditions  
224 after conception. Squirrels occasionally defend a second adjacent midden, but as they rarely  
225 store food in secondary middens we considered each squirrel's location to be the location of  
226 its primary midden. We then analysed each female's parturition date the following spring as  
227 influenced by her own genes (the DGE), and the identities and genotypes (the IGE) of those  
228 competing individuals as identified in the autumn census. Some females gave birth in  
229 multiple years, in which case they were included each year they did so, with an updated set  
230 of nearest neighbours as necessary. Females may attempt multiple litters in years of high  
231 resources, or if their first litter fails (Boutin et al. 2006; McAdam et al. 2007; Williams et al.  
232 2014), but we limited our analyses to each female's first litter of each year (e.g. Dantzer et  
233 al. 2013).

234 We tagged pups while they were still on their mother's territory, so maternity is known  
235 for all non-immigrants. Male red squirrels provide no parental care. From 2003 onwards,  
236 paternities were, therefore, assigned by collecting tissues samples from the ears of adults  
237 and neonatal pups. We used these tissue samples to genotype all adults and pups since  
238 2003 at 16 microsatellites (Gunn et al. 2005) analysed with 99% confidence using CERVUS  
239 3.0 (Kalinowski *et al.* 2007; see Lane *et al.* 2007, 2008 for further details). This method gives  
240 an estimated error rate of paternities, based on mismatches between known mother-  
241 offspring pairs, of around 2% (Lane et al. 2008), which we consider acceptable.  
242 Approximately 90% of yearly pups are assigned paternities with known males while the  
243 remaining 10% are analysed further in Colony 2.0 (Jones and Wang 2010) to determine  
244 whether they might still be full or half siblings from unknown sires using 95% confidence in  
245 maximum likelihoods.

246

#### 247 Data analysis

248 Data on the locations of squirrel territories were available from the autumns in 1991-2015,  
249 and so we looked at parturition dates in the following springs (i.e. 1992-2016). All squirrels  
250 identified as holding a territory in an autumn census were included in this analysis, including  
251 females that did not attempt a litter in the following spring, and males. These individuals had  
252 missing values entered for their parturition dates. Their inclusion was nonetheless necessary  
253 as they acted as potential competitors during the autumn for those squirrels that did have a  
254 litter.

255 We initially fitted two mixed-effects linear models to our data, the first to estimate  
256 indirect effects (the “phenotypic model”), and second to split these indirect effects into  
257 genetic and non-genetic components (the “genetic model”). All models we fitted in the  
258 software “ASReml” ver 4.1; (Gilmour et al. 2015). We divided raw parturition dates by the  
259 standard deviation of all observations, giving a sample with a variance of 1, making the  
260 variance components easier to interpret (Schielzeth 2010). In each model we included the  
261 fixed effects of study area (a two-level factor), year (as a continuous linear covariate),  
262 whether or not the spruce trees “masted” ((produced a super-abundance of cones;  
263 Silvertown 1980; Kelly 1994; Lamontagne and Boutin 2007) in the year of the autumn  
264 census (a two-level factor), age and age<sup>2</sup> of the squirrel, and the random effects of year and  
265 squirrel identity, to account for repeated measures on squirrels across years. If the age of  
266 the squirrel was not known, the mean age of all other squirrels in that breeding season was  
267 entered. Estimating the squirrel identity random effect allowed the calculation of the  
268 (conditional) repeatability of individual squirrel parturition dates (Nakagawa and Schielzeth  
269 2010). Additionally, while we predicted a negative covariance between neighbours due to  
270 competition for resources (especially during high-density conditions), this could be masked  
271 by positive spatial autocorrelation in resource availability within a study-area. This would  
272 generate a net signal of positive phenotypic covariance among-neighbours (Stopher et al.  
273 2012; Regan et al. 2016; Thomson et al. 2018). To control for this we fitted a term  
274 accounting for (non-socially determined) environmental heterogeneity in resource  
275 abundance. In our multiyear data set we were unable to obtain convergence from our data  
276 with a model in which a separate spatial autocorrelation term for each year was fitted (since  
277 the spatial distribution of territory quality is not consistent year-to-year; LaMontagne et al.  
278 2013). As a simpler alternative, we assigned each red squirrel within each year to one 150 m  
279 x 150 m square within a grid of non-overlapping squares that encompassed the study area  
280 (hereafter referred to as “squares”). Each square was given a unique label comprising its  
281 location and the year, and so by fitting this as a random effect we could account for any  
282 similarity among red squirrels within each 150 m x 150 m area in each year. This is similar to  
283 the approach of Germain et al (2016), who found that an equivalent “grid” term fitted their  
284 data better than a matrix of local overlap (c.f. Stopher et al. 2012), or a modelling spatial  
285 autocorrelation in the residuals (c.f. Costa e Silva et al. 2013). We repeated this analysis  
286 with squares of 75 m x 75 m or 300m x 300 m. These results were qualitatively similar to the  
287 analysis with the intermediate size squares, and so are presented in the supplementary  
288 materials (Table S1).

289 To estimate indirect effects, we added the identities of the six nearest squirrels as six  
290 random effects (see below for our explorations of other possible neighbourhood sizes),  
291 assuming that all random competitor effects came from the same distribution, with a mean of



292 zero and a single variance to be estimated. This allowed us to estimate a single indirect  
293 phenotypic effect, and the covariance between this term and the direct effect of squirrel  
294 identity. We based “nearest” on location of the primary midden during the autumn census.  
295 We associated each neighbour ( $j$ ) of each focal individual ( $i$ ) with variable intensity of  
296 association factors ( $f_{ij}$ ). This allowed the indirect effect of each neighbour  $j$  actually  
297 experienced by  $i$  to be mediated by their spatial proximity, with  $f_{ij} = 1 / (1 + \text{distance})$ , where  
298 distance was the Euclidean distance between the center of individuals’ territories, measured  
299 in units of 30m. This value is bounded between 0 and 1, with low values representing  
300 individuals that were far apart and high values representing individual that were close. We  
301 used the inverse of distance here, but any biologically relevant measure representing  
302 intensity of social interaction could be used (Fisher and McAdam 2017). To weight the  
303 strength of the indirect effects, we replaced all 1s in the indirect effect design matrix with  
304 these terms (Muir 2005; Cappa and Cantet 2008). All individuals farther than the 6 nearest  
305 neighbours were not modelled as having an indirect effect (but see below). The phenotypic  
306 model therefore used the following form, with a population mean accounting for the fixed  
307 effects for  $i$  ( $\mu_{Fi}$ ), a direct phenotypic effect ( $P_{Di}$ ) and a total indirect influence arising from the  
308 sum of competitor specific indirect effects ( $P_{Sj}$ ) for the 6 nearest neighbours. Note, a single  
309 variance for the indirect effect is estimated, from a distribution made up of all competitor  
310 effects (see above). Additionally, there are multiple measures per squirrel across years,  
311 hence we include the random effect for the year  $t$  ( $K_t$ ). Our model predicts a parturition date  
312 for the  $i$ th individual in a given year ( $y_{it}$ ) and so the residual term is specific to an individual  
313 in a year ( $e_{it}$ ).

314

$$315 \quad y_{it} = \mu_{Fi} + P_{Di} + \sum_{i \neq j}^n f_{ij} (P_{Sj}) + K_t + e_{it} \quad 1$$

316

317 This phenotypic model estimated the variance among squirrels in their parturition dates, the  
318 variance in parturition dates caused by repeatable effects of neighbour identities, and the  
319 within-individual covariance between direct and indirect phenotypic effects (i.e.  $Cov(P_{Di},$   
320  $P_{Si})$ ). For our genetic model, we split these phenotypic effects into additive genetic and  
321 permanent environment effects by the incorporation of a pedigree (Kruuk 2004; Wilson et al.  
322 2010). We estimated the DGEs and IGEs on parturition dates, their covariance, and the  
323 equivalent terms for the permanent environmental effects:

324

$$325 \quad y_{it} = \mu_{Fi} + A_{Di} + PE_{Di} + \sum_{i \neq j}^n f_{ij} (A_{Sj} + E_{Sj}) + K_t + e_{it} \quad 2$$

326

327 Where individual  $i$ 's parturition date in year  $t$ , is comprised of the fixed effect mean, a direct  
328 additive genetic effect ( $A_{Di}$ ), a direct permanent environmental effect ( $PE_{Di}$ ), both the  
329 additive genetic ( $A_{Sj}$ ) and non-additive genetic ( $E_{Sj}$ ) indirect effects of all the  $n$  neighbours ( $j$ )  
330 that  $i$  interacts with, a year term ( $K_t$ ), and an individual by year specific residual term ( $e_{it}$ ).

331 This model has not been applied to wild animals before, and we fully acknowledge  
332 that our choice to consider only the 6 nearest neighbours here is somewhat arbitrary, as  
333 indeed is the scaling of  $f_{ij}$ . Therefore, we also explored different numbers of neighbours,  
334 and different methods for defining our  $f_{ij}$  terms. We then monitored how this influenced the  
335 estimates of the variance parameters, to determine whether the model was particularly  
336 sensitive to altering these factors (see also: Costa e Silva *et al.* 2017). We present results  
337 using  $f_{ij} = 1/(1 + \text{distance}^2)$  in the supplementary materials (Table S1). In the supplementary  
338 materials we also present results where we defined the competitors as all those within 60,  
339 130 or 200 metres, without weighting by distance, up to 24 competitors (Table S1), and  
340 investigations with varying numbers of neighbours 1-5, 9, 12, 15, 18 & 24; Table S2). Neither  
341 changing the number of neighbours nor rescaling intensity of association terms changed the  
342 number of model parameters estimated. Therefore, information criteria-based approaches  
343 for comparing model fits were not appropriate. Additionally, we were primarily interested in  
344 our ability to estimate, and the magnitude and significance of, certain parameters (our  
345 indirect effects), hence finding the most parsimonious model of parturition date was not a  
346 goal of ours. Instead we simply assessed the change in variance components, noting the  
347 size of the parameter estimates and size of the standard errors. We focus on the results with  
348 the 6 closest neighbours, as this seemed the median result among the variations we tried.  
349 Using the inverse of distance<sup>2</sup> squared led to a large increase in the standard errors of the  
350 DGE estimate, which only occurred in this model, hence we considered simply the inverse of  
351 distance as more appropriate.

352 We tested the significance of the direct-indirect phenotypic covariance in the  
353 phenotypic model using a likelihood ratio-test (LRT) between a model with the covariance  
354 freely estimated and one with it fixed to zero, and tested the significance of the indirect  
355 phenotypic effect using a LRT between the model with the indirect effect (and a zero  
356 covariance) and a model without it. With the genetic model, we tested the significance of the  
357 DGE-IGE covariance, and the IGE variance, in the same way, in models that still estimated  
358 the full direct-indirect phenotypic covariance matrix. We assumed the LRT statistic was  
359 distributed as a 50:50 mixture of  $\chi^2_1$  and  $\chi^2_0$  when testing single variance components  
360 (following Self and Liang 1987) but as  $\chi^2_1$  when testing covariances. Note that, even where  
361 terms were non-significant, they were retained as our best estimate of the corresponding  
362 parameter for our estimates of predicted responses to selection (as described below). We

363 report correlations, although if the variance of either the direct or indirect effect was very  
364 small ( $<0.0001$ ), then we assumed it was essentially zero, and so then we report the  
365 correlation as “undefined”. Although they were not directly relevant to the biological  
366 hypotheses being tested, the statistical significance of the fixed effects in the genetic model  
367 was tested using conditional Wald tests (see: Gilmour et al. 2015). This approach to testing  
368 the significance of fixed effects in mixed linear models performs well in situations with limited  
369 sample sizes (Kenward and Roger 1997). We then calculated partial  $R^2$  for each fixed effect,  
370 following Edwards et al. (2008), using the residual degrees of freedom as calculated by  
371 ASReml (1174 for the genetic model).

372

### 373 Influence of population density on indirect effects

374 We consider population density during the resource caching period to be key to resource  
375 acquisition. Consequently, for any given year of parturition the relevant measure of density  
376 was obtained from the census in the autumn of the year *prior* to parturition, i.e. at the same  
377 time as when the territory ownership was defined. As the study area has grown marginally  
378 since the start of the project, we restricted counts to individuals holding a territory within a  
379 defined 38ha area that has been constant throughout the entire study period. Across both  
380 study areas in all years the median population density in the autumn was 1.69 squirrels  $\text{ha}^{-1}$   
381 (Fig. 1). We, therefore, labelled each study area within each year with a density higher than  
382 this as “high density” (1994, 1998-2000, 2006 and 2015 for both study areas, 1991-1993,  
383 1995-1997, 2001 and 2002 for Sulphur only and 2011-2014 for Kloo only), and so the  
384 remainder as “low density” There were, therefore, 26 instances of low density conditions,  
385 and 24 instances of high density conditions. There are several instances of study areas  
386 having exactly the median density, hence why there are more low- than high-density  
387 conditions.

388

389

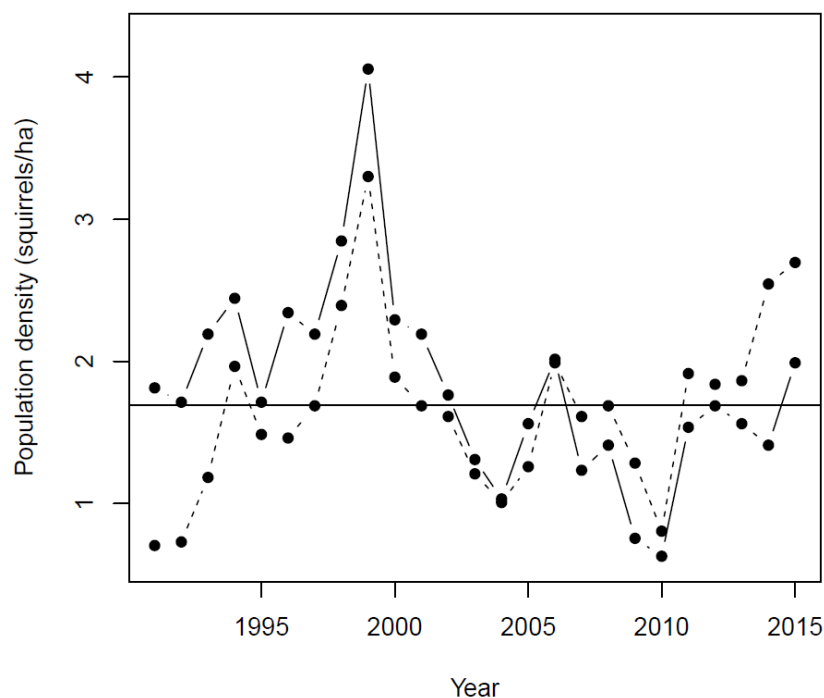

390

391

392 Figure 1. Estimated population densities across both study areas in our study (“Kloo” is  
393 solid line, “Sulphur” is dashed line). Points above the line (the median density: 1.69  
394 squirrels ha.<sup>-1</sup>) were counted as “high density”, points below the line as “low density”.

395

396 For both the phenotypic and the genetic models, we fitted an interaction between population  
397 density (low or high) and each random effect. This gave us separate density-specific  
398 estimates of each of the variances (DGEs, IGES, and non-genetic versions) and  
399 covariances, the among-year variances and the among-square variances for low- and high-  
400 density study areas. To obtain stable model convergence in the genetic model, we were  
401 required to fix the direct permanent environment effect in low-density years to  $0.1 \times 10^{-4}$ , but  
402 since this term was estimated to be very small in the model across all years, this is likely not  
403 problematic. There was a single residual variance in each model. We also included density  
404 as two-level factor in the fixed effects, and an interaction between this term and each of the  
405 other fixed effects, to allow them to vary between low- high-density conditions. We tested for  
406 significance of indirect effects in both low- and high-density conditions in the same way as  
407 for the full models. When testing the significance of terms for low-density, we maintained the  
408 full structure (e.g. IGEs and their covariance with DGEs in the genetic model) for high-  
409 density conditions, and vice versa.

410

411 Calculating variance parameters and the predicted response to selection

412 To assess the contribution of indirect effects to phenotypic and genetic variances, we  
 413 estimated the variance in individuals' phenotypic effects on the population mean parturition  
 414 date ( $\hat{\sigma}_{PE}^2$ , incorporating both consistent direct and indirect phenotypic effects; for the  
 415 phenotypic model), and variance in individuals' heritable influence on the population mean  
 416 parturition date ( $\hat{\sigma}_H^2$ ; for the genetic model, commonly referred to as the "total heritable  
 417 variance"). Following Bijma (2011) and Costa e Silva *et al.* (2013) these are:

418

$$419 \quad \hat{\sigma}_{PE}^2 = V_{PD} + 2n\bar{f}_{ij}Cov(P_D, P_I) + (n\bar{f}_{ij})^2V_{PI} \quad 3$$

420

$$421 \quad \hat{\sigma}_H^2 = V_{AD} + 2n\bar{f}_{ij}Cov(A_D, A_I) + (n\bar{f}_{ij})^2V_{AI} \quad 4$$

422

423 Where  $n$  is the number of neighbours (excluding the focal individual, so 6),  $\bar{f}_{ij}$  is the mean  
 424 intensity of association factor,  $V_{PD}$  and  $V_{AD}$  are the direct phenotypic and additive genetic  
 425 variances respectively,  $Cov(P_D, P_I)$  and  $Cov(A_D, A_I)$  are the phenotypic and genetic direct-  
 426 indirect covariances respectively, and  $V_{PI}$  and  $V_{AI}$  are the indirect phenotypic and additive  
 427 genetic variances respectively. The  $\bar{f}_{ij}$  was calculated as 0.330 across the whole dataset,  
 428 0.298 at low densities and 0.352 at high densities, which means a squirrel's 6 nearest  
 429 neighbours were on average, 60.9m, 70.7m and 55.2m from it across the whole dataset, at  
 430 low densities, or at high densities respectively. Note that  $\hat{\sigma}_H^2$ , unlike traditional heritability, can  
 431 exceed 1; see Bijma (2011) for the mathematical demonstration of this, and Ellen *et al.*  
 432 (2014) for empirical examples in livestock.

433 In order to calculate the predicted response to selection in the presence of IGEs  
 434 among related individuals, we combined equation 15 of Bijma and Wade (2008), and  
 435 equation S5\_2 of Costa e Silva *et al.* (2013), setting total phenotypic variance as 1. In a  
 436 previous study (Fisher *et al.* 2017) we determined that selection on parturition date acts  
 437 primarily among neighbours within 130m, and, so the relative strength of multilevel selection  
 438 ( $g$ ) is approximately zero, giving:

439

$$440 \quad \Delta\bar{P} = \beta_{W_{DP}}\{r\hat{\sigma}_H^2 + (1-r)[V_{AD} + n\bar{f}_{ij}Cov(A_D, A_I)]\} \quad 5$$

441

442 Note that as we have already defined  $n$  as the number of neighbours excluding the focal  
 443 individual, we have altered  $n-1$  in eq. 15 of Bijma and Wade (2008) to  $n$ .

444 In eq. 5 the change in the mean phenotype ( $\Delta\bar{P}$ ) is predicted by the selection gradient  
 445 of the phenotype on relative direct fitness ( $\beta_{W_{DP}}$ ), multiplied by a term encompassing the  
 446 genetic variance parameters. We estimated  $\beta_{W_{DP}}$  across all females in the whole dataset by

447 regressing relative fitness (number of pups born to each individual in a given year that  
448 recruited to the population as adults, divided by the population average for that year) on  
449 standardised parturition dates (mean centred and divided by the standard deviation across  
450 the whole dataset). This measure of fitness maps individuals that recruited into our  
451 population (and hence held territories, necessary to be included in our analysis) to the  
452 number of recruits they have. Arguably, early survival is a trait of the juvenile, not the parent,  
453 and hence this fitness component should not be assigned to the parent (Thomson and  
454 Hadfield 2017). However, as parturition dates are only expressed by females, and do not  
455 influence adult survival (Lane et al. unpublished), our estimates of selection should not be  
456 biased. We re-estimated selection gradients at low and high densities by fitting an interaction  
457 with low/high density to parturition date, to give different estimates for  $\beta_{W_{DP}}$  in each  
458 condition. Densities (and competitive neighbourhoods) in the autumn of a given year were  
459 associated with parturition dates and fitness in the following spring (year +1). Relatedness ( $r$ )  
460 is the mean coefficient of relatedness among the 7 squirrels in each neighbourhood (the  
461 focal squirrel and its 6 nearest neighbours). We used the pedigree to calculate  $r$  as 0.094  
462 across the entire data set, 0.087 at low densities and 0.098 at high densities. We multiplied  
463  $\Delta\bar{P}$  by the standard deviation of parturition date, to give the result as “days per generation”.  
464 We compare this to a case where IGEs were equal to zero, and so the response to selection  
465 was equal to  $\beta_{W_{DP}} V_{AD}$ .

466

## 467 Results

468

469 In total, 1862 unique red squirrels were recorded a total of 4362 times in autumn censuses  
470 as holding territories, and so were included in the analysis. There were 555 unique females  
471 that had at least one litter, with a mean of 2.1 (range = 1-8, standard deviation = 1.3)  
472 recorded parturition dates each. The median date of first litters was 23rd April, with  
473 interquartile ranges of 6th April to 11th May. There were 364 females that had no recorded  
474 parturition dates, and 943 males. 1196 squirrels had a known mother, and 498 had a known  
475 father, with 481 of those having both parents known.

476 Parturition dates differed greatly among years and less so among squares, with  
477 variance among-years accounting for 32.0% of the variance in the genetic model, while  
478 variance among-squares accounted for 4.0% of the total variance (all variance component  
479 estimates are shown in Table 1, with fixed effect estimates shown in Table 2). While there  
480 was no linear trend across years, parturition dates were significantly earlier following mast  
481 years by approximately 40 days.



482           Alongside these environmental variations, individuals showed some degree of  
483 consistency in their parturition dates, with the direct variance among-individuals in parturition  
484 date in the phenotypic model accounting for 3.8% of the phenotypic variance. Indirect  
485 phenotypic effects of neighbours were significant (LRT,  $\chi^2_{0.5} = 13.755$ ,  $p < 0.001$ ), but the  
486 covariance between the direct and indirect phenotypic effects was not ( $\text{cor} = -0.094$ , LRT,  $\chi^2_1$   
487  $= 0.111$ ,  $p = 0.739$ ), indicating that individuals that give birth earlier do not influence their  
488 neighbours in any particular direction relative to their own parturition date. Individuals'  
489 consistent differences in their own phenotypes and consistent effects on neighbours ( $\hat{\sigma}_{PE}^2$ )  
490 was calculated as 31.4% of the phenotypic variation, indicating that social effects account for  
491 a large amount of the variation in parturition date. Alongside this consistency, individuals  
492 showed a degree of plasticity, with older squirrels having earlier parturition dates, while the  
493 positive quadratic effect indicates a nonlinear effect of age in which squirrels began to breed  
494 later at older ages.

495           Parturition date showed direct heritability, with  $V_{AD}$  in the genetic model accounting  
496 for 4.8% of the phenotypic variance (note this differs from previous estimates of  $h^2$  for this  
497 trait in this system as here we include the among-year variation in  $V_P$ ). The estimate for the  
498 IGEs was not different from zero (LRT,  $\chi^2_{0.5} = 0.003$ ,  $p = 0.480$ ), as was the DGE-IGE  
499 covariance ( $\text{cor} = \text{undefined}$ , LRT,  $\chi^2_{0.5} = 0.119$ ,  $p = 0.729$ ). We calculated the total heritable  
500 variance of parturition date,  $\hat{\sigma}_H^2$ , as 6.8%, a modest increase over  $V_{AD}$ . The very small DGE-  
501 IGE covariance indicates that genotypes for early parturition dates did not affect their  
502 neighbours in any consistent direction relative to their own parturition date.

503

#### 504 Low vs high density comparison

505 In low density conditions, both the variance in indirect phenotypic effects (LRT,  $\chi^2_{0.5} = 0.808$ ,  
506  $p = 0.184$ ) and the direct-indirect phenotypic covariance ( $\text{cor} = 0.737$ , LRT,  $\chi^2_{0.5} = 0.1.206$ ,  $p$   
507  $= 0.272$ ) were not significantly different from zero. At high densities there were significant  
508 phenotypic indirect effects (Table 1; LRT,  $\chi^2_{0.5} = 9.523$ ,  $p = 0.001$ ), although the covariance  
509 was not different from zero ( $\text{cor} = -0.023$ , LRT,  $\chi^2_{0.5} = 0.004$ ,  $p = 0.952$ ).

510           Given that we detected no phenotypic indirect effects in low-density conditions, it is  
511 unsurprising that the IGEs (LRT,  $\chi^2_{0.5} = 0.000$ ,  $p = 0.500$ ) and the DGE-IGE covariance in  
512 these conditions were also not different from zero ( $\text{cor} = \text{undefined}$ , LRT,  $\chi^2_1 = 0.566$ ,  $p =$   
513  $0.452$ ). For high densities, IGEs were considerably stronger than across the whole dataset,  
514 and more than one standard error from zero, although still not significantly different from  
515 zero (LRT,  $\chi^2_{0.5} = 0.607$ ,  $p = 0.218$ ). The covariance between DGEs and IGEs was negative  
516 but not different from zero ( $\text{cor} = -0.401$ , LRT,  $\chi^2_{0.5} = 0.688$ ,  $p = 0.407$ ). Although we reiterate  
517 that neither covariance was statistically significant, based on our parameter estimates in low-

518 density conditions  $\hat{\sigma}_H^2$  was 14.3%, which was higher than  $V_{AD}$ , as this calculation includes the  
519 positive DGE-IGE covariance estimate (despite the lack of variance in IGEs rendering the  
520 correlation undefined). In high-density conditions  $\hat{\sigma}_H^2$  was 14.2%, much higher than with  
521 direct genetic effects alone due to the additional genetic variance from IGEs. We stress that,  
522 as the estimates for the IGEs and their covariances with the DGEs were not significantly  
523 different from zero, the estimates of  $\hat{\sigma}_H^2$  should be interpreted with caution.

524 The square term revealed that there was some variation attributable to spatial  
525 location in both conditions, accounting for 4.2% in low-density, and 3.1% in high-density  
526 conditions, of the variance in the genetic model split between low and high densities. Finally,  
527 there was also substantial among-year variance in both conditions, accounting for 32.2%  
528 and 38.4% for the observed variance in low and high-density conditions respectively. We  
529 present estimates for fixed effects at low and high densities from the genetic model in the  
530 supplemental materials (Table S3); for the calculation of partial  $R^2$ s, we calculated the  
531 residual degrees of freedom to be 1169.

532

533 Predicted response to selection

534 Across all years, selection favoured squirrels with earlier parturition dates (linear selection  
535 gradient  $\beta = -0.249$ ). The standard deviation of parturition date was 23.32. From eq. 5, this  
536 gives a predicted response when accounting for IGEs across the entire data set of -0.342  
537 days generation<sup>-1</sup>, or -0.279 days generation<sup>-1</sup> if IGEs were not considered. While the  
538 magnitude of selection differed, breeding earlier was still favoured whether squirrels were  
539 breeding under low ( $\beta = -0.239$ ) or high densities ( $\beta = -0.286$ ). At high densities, despite  
540 stronger selection, we calculated a slower predicted evolutionary response, due to the  
541 negative DGE-IGE covariance. At low densities, updating all parameters except  $n$ , the  
542 predicted response was -0.553 days generation<sup>-1</sup>, while at high densities it was -0.183 days  
543 generation<sup>-1</sup>. Predictions solely based on additive genetic variance multiplied by the  
544 selection gradient were -0.262, and -0.353 days generation<sup>-1</sup>, for low densities and high  
545 densities respectively, therefore giving a faster response when selection is strongest, as is  
546 typical.

547

## 548 Discussion

549

550 Indirect effects are present and change with population density

551 Red squirrels live in territories surrounded by conspecifics, with whom they engage in social  
552 interactions through vocalizations, competition for resources, and mating interactions. Our

553 analyses show that these interactions can lead to substantial indirect effects on female  
 554 squirrel reproductive traits. These are detected here as a repeatable influence of competitor  
 555 identity on the parturition date of focal individuals – which accounted for a much greater  
 556 amount of variation in parturition date than direct effects of individual identity alone. Our  
 557 results also suggest that these indirect effects are more important determinants of focal  
 558 phenotypes at high densities than at low densities. Specifically, at high densities, there is  
 559 significant variation in the extent to which squirrels influence each other's parturition dates,  
 560 but this is not the case at low densities.  
 561

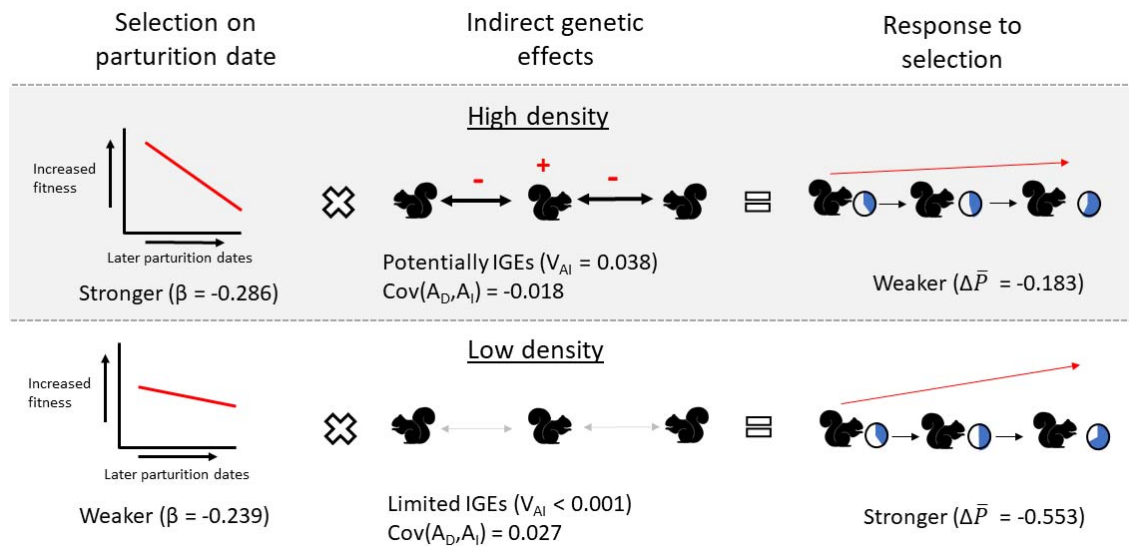

562  
 563 Figure 2. A summary of our results for the analysis of indirect genetic effects at low and high  
 564 densities. At high density selection was stronger ( $\beta = -0.286$ ), and there were direct genetic  
 565 effects (variance = 0.053). There were significant phenotypic indirect effects, and non-zero  
 566 but statistically non-significant indirect genetic effects (variance = 0.038). The DGE-IGE  
 567 covariance ( $Cov(A_D, A_i)$ ) was estimated to be negative (estimate = -0.018). These  
 568 parameters gave a weaker response to selection ( $\Delta \bar{P} = -0.183 \text{ days.generation}^{-1}$ ). At low  
 569 density selection was weaker ( $\beta = -0.239$ ), while there were direct genetic effects of a similar  
 570 magnitude to at high densities (variance = 0.047), but indirect genetic effects were absent  
 571 (variance = < 0.001). The DGE-IGE covariance was estimated still (estimate = 0.027). These  
 572 parameters gave a moderate response to selection ( $\Delta \bar{P} = -0.553 \text{ days.generation}^{-1}$ ). Note in  
 573 all cases negative  $\Delta \bar{P}$  values indicate the evolution of earlier parturition dates. For the  
 574 response to selection, more full circles represent later parturition dates. Red symbols  
 575 represent the DGE-IGE covariance, showing that individuals with genes to be early (red  
 576 plus) cause their neighbours to give birth later (red minus).

577 **Table 1.** Variance component estimates (with their approximate standard errors in brackets) for each element of the variance-covariance  
 578 structure from our models. Terms that were bound to values very close to zero will not have a standard error estimated, and so have “-“  
 579 instead. Models without a given term have “NA” entered in that cell. Terms highlighted in bold were >2 times greater than their standard errors,  
 580 while terms underlined were between 1 and 2 times greater than their standard errors. Variance in direct genetic effects are indicated by  $V_{AD}$ , in  
 581 indirect genetic effects by  $V_{AI}$ , and their covariance by  $Cov(A_D, A_I)$ . Equivalent notation with “P” instead of “A” refers to variance in purely  
 582 phenotypic effects for the phenotypic model, and permanent environment effects in the genetic model.  $V_S$  is the among-square variance (with  
 583 squares of size 150m x 150m),  $V_Y$  is the among-year variance, and  $V_R$  is the residual variance.

| Model                             |              | $V_{AD}$                | $V_{AI}$                | $Cov(A_D, A_I)$   | $V_{PD}$                | $V_{PI}$                | $Cov(P_D, P_I)$         | $V_Y$                   | $V_S$                          | $V_R$            |
|-----------------------------------|--------------|-------------------------|-------------------------|-------------------|-------------------------|-------------------------|-------------------------|-------------------------|--------------------------------|------------------|
| Whole dataset                     |              |                         |                         |                   |                         |                         |                         |                         |                                |                  |
| Phenotypic model                  |              | NA                      | NA                      | NA                | <b>0.038</b><br>(0.012) | <b>0.076</b><br>(0.023) | -0.005<br>(0.014)       | <b>0.317</b><br>(0.098) | <b>0.038</b><br>(0.014)        | 0.197<br>(0.017) |
| Genetic model                     |              | <b>0.048</b><br>(0.012) | <0.001<br>(-)           | 0.005<br>(0.015)  | <0.001<br>(-)           | <b>0.063</b><br>(0.023) | -0.018<br>(0.020)       | <b>0.320</b><br>(0.099) | <b>0.040</b><br>(0.014)        | 0.192<br>(0.016) |
| Low vs. high density comparison   |              |                         |                         |                   |                         |                         |                         |                         |                                |                  |
| Phenotypic model split by density | Low density  | NA                      | NA                      | NA                | <u>0.043</u><br>(0.022) | 0.031<br>(0.046)        | <u>0.027</u><br>(0.024) | <b>0.316</b><br>(0.123) | <u>0.040</u><br><u>(0.024)</u> | 0.205<br>(0.019) |
|                                   | High density | NA                      | NA                      | NA                | <b>0.040</b><br>(0.019) | <b>0.078</b><br>(0.030) | -0.001<br>(0.022)       | <b>0.380</b><br>(0.150) | <u>0.028</u><br>(0.178)        |                  |
| Genetic model split by density    | Low density  | <b>0.047</b><br>(0.020) | <0.001<br>(-)           | 0.027<br>(0.030)  | <0.001<br>(-)           | 0.021<br>(0.045)        | -0.003<br>(0.036)       | <b>0.322</b><br>(0.126) | <u>0.042</u><br>(0.024)        | 0.189<br>(0.017) |
|                                   | High density | <b>0.053</b><br>(0.018) | <u>0.038</u><br>(0.037) | -0.018<br>(0.023) | <0.001<br>(-)           | 0.033<br>(0.046)        | -0.001<br>(0.026)       | <b>0.384</b><br>(0.151) | <u>0.031</u><br>(0.018)        |                  |

584 **Table 2.** Estimates and relevant statistics for fixed effects from final model with all years.  
 585 Study area was a two-level factor, with “Kloo” as the reference level, hence the shown  
 586 estimate is for the deviation of the “Sulphur” study area. Following a mast was a two-level  
 587 factor, with not following a mast as the default, hence the estimate is for the deviation in  
 588 parturition dates following a mast year. The denominator degrees of freedom are indicated  
 589 by df\_d, while the numerator degrees of freedom were 1 in all cases.

| Term                          | Estimate | Standard error | df_d   | F-statistic | P-value | R <sup>2</sup> |
|-------------------------------|----------|----------------|--------|-------------|---------|----------------|
| <b>Intercept</b>              | -6.684   | 32.355         | 23.3   | 0.06        | 0.810   | NA             |
| <b>Study area (SU)</b>        | 0.176    | 0.054          | 5.72   | 10.68       | 0.002   | 0.009          |
| <b>Year</b>                   | 0.006    | 0.016          | 23.1   | 0.16        | 0.693   | < 0.001        |
| <b>Following a mast (yes)</b> | -1.71    | 0.288          | 22     | 35.57       | < 0.001 | 0.029          |
| <b>Age</b>                    | -0.002   | < 0.001        | 1091.5 | 145.85      | < 0.001 | 0.111          |
| <b>Age<sup>2</sup></b>        | < 0.001  | < 0.001        | 1164.0 | 95.59       | < 0.001 | 0.075          |

590  
 591 The social effects on parturition date we documented indicate that much more of an  
 592 individual's phenotype is under the control of those it socially interacts with than is  
 593 determined by its own identity, even in a solitary and territorial species. Work on Eucalyptus  
 594 trees (Costa e Silva et al. 2013) implicated competition for limited resources as the source of  
 595 indirect effects, and our results are consistent with this idea, hence highly competitive red  
 596 squirrels may acquire larger amounts of resources from the environment, leaving less for  
 597 other individuals. Earlier studies have shown that red squirrel females may be food limited to  
 598 some degree, aside from in years following a mast event. For example, earlier parturition  
 599 dates and lower levels of oxidative protein damage and higher levels of antioxidants were  
 600 found when food was supplemented (Kerr et al. 2007; Fletcher et al. 2013b; Williams et al.  
 601 2014), and individuals are more likely to survive over winter with a larger food cache (Larivée  
 602 et al. 2010; LaMontagne et al. 2013), suggesting that not all individuals have enough stored  
 603 food. However, female squirrels appear to reproduce below capacity in non-mast years, and  
 604 upregulate their reproduction *before* pulsed resources are available (Boutin et al. 2006,  
 605 2013), and so they are likely not completely food-limited. The additional insight from the  
 606 current study is that, for focal individuals, competitive effects on phenotype depend not  
 607 simply on high density, but also on the identities – and so phenotypes - of their nearest  
 608 neighbours.

609 Our analysis did not explore the specific mechanism (or trait(s)) that mediate indirect  
 610 phenotypic effects from competition, hence we have not confirmed that red squirrels are  
 611 competing for limited food resources, although this explanation seems likely. We can  
 612 however, suggest a second explanation based on prior knowledge of the system: red

613 squirrels might influence each other's parturition dates through acoustic territorial  
614 interactions. Red squirrels give territorial calls ("rattles"), to which neighbours behaviourally  
615 respond (Shonfield 2010) and which function to maintain their territory from conspecifics  
616 (Smith 1978; Lair 1990; Siracusa et al. 2017). Additionally, red squirrels rattle more when  
617 they have a higher local population density (Dantzer et al., 2012; Shonfield et al. 2012),  
618 while red squirrel mothers increase the growth rate of their pups when playback of territorial  
619 vocalizations leads to the perception of higher local population density (Dantzer et al. 2013).  
620 This is through upregulation of maternal glucocorticoids, part of the stress axis (Dantzer et  
621 al. 2013). Other life history traits, such as parturition date, may be influenced by rattles at  
622 high densities, allowing individuals to influence each other's parturition dates. Therefore,  
623 acoustic interactions among-neighbours, which enable neighbours to influence each other's  
624 reproduction, may be a source of indirect effects, particularly in high-density conditions.

625

#### 626 Indirect effects with a limited heritable basis

627 While our analyses provide statistical support for considerable indirect effects of competitors  
628 on a focal individual's parturition date, we were unable to conclusively demonstrate that  
629 these indirect effects were underpinned by genetic variation. Estimated effect sizes were  
630 larger at high densities, in line with our predictions and the phenotypic effects. If we  
631 incorporated the estimates of variance attributable to IGEs, and the DGE-IGE covariances,  
632 into our predicted response to selection, we expected a faster response to selection in low-  
633 density conditions ( $-0.553$  days generation<sup>-1</sup>) when selection was weakest, while a slower  
634 response to selection in high-density conditions ( $-0.183$  days generation<sup>-1</sup>) when selection  
635 was strongest, compared to across the whole data set ( $-0.342$  days generation<sup>-1</sup>). Therefore,  
636 a negative DGE-IGE covariance counteracted stronger selection at high densities to give a  
637 slower evolutionary response. However, while the point estimates of predicted change  
638 indicate IGEs are potentially strong enough to make a meaningful difference to evolutionary  
639 dynamics, we acknowledge they are estimated with high uncertainty.

640 Previous work on livestock has shown that IGEs negatively correlated with DGEs can  
641 reduce or even reverse the expected response to selection (Costa e Silva et al. 2013; Muir  
642 et al. 2013; Ellen et al. 2014), as we have found. The evolutionary stasis of heritable traits  
643 under directional selection is a well-known observation in need of an explanation in the study  
644 of trait evolution in wild populations (Merilä et al. 2001; Kokko et al. 2017). IGEs that  
645 consistently counteract selection responses (compared to a DGE-only scenario) would  
646 reduce evolutionary change, as we have shown under high-densities, and so could  
647 contribute to a lack of evolutionary change. Whether this is a general explanation for  
648 evolutionary stasis remains to be explored (Wilson 2014). In our study population, despite



649 phenotypic selection on parturition dates (which as noted above are heritable), we have  
650 observed no evolution in this trait over 20 years (Lane et al. 2018). However, Lane et al  
651 (2018) found that the association between parturition date and fitness was entirely a residual  
652 correlation, rather than a genetic one, so no alternative explanation for evolutionary stasis  
653 (such as IGEs) is required.

654         The contribution of the variance of the IGEs, and the DGE-IGE covariance to the  
655 expected response to selection is not certain, as these estimates were not statistically  
656 significant. If IGEs are not different from zero, then the expected response to selection may  
657 not differ from that predicted by the breeder's equation (Bijma and Wade 2008). We note  
658 that the non-significance of our IGE variance estimates may have been driven by a high  
659 degree of uncertainty (large standard errors), rather than the magnitude of the effect, as in  
660 high density years the  $V_{AI}$  was quite close in absolute size to  $V_{AD}$ , and their contribution to  
661 total heritable variance and the predicted response to selection was large enough to change  
662 the expected response in different conditions. As such, the value of incorporating these  
663 estimates into predictive models is possibly large, but uncertain.

664         Predictions about the speed of evolution based on  $V_{AD}$  or  $\sigma_H^2$  can be misleading,  
665 because, as we have demonstrated, a negative DGE-IGE covariance detracts from the  
666 response to selection (see eq. 5), even if there is a large amount of genetic variance. This is  
667 similar to how negative genetic correlations between traits under equivalent selection can  
668 limit their evolution (Lande 1979; Kirkpatrick and Lande 1989). Additionally, there are several  
669 reasons why not all of  $\sigma_H^2$  may be utilized in the response to selection. As can be seen from  
670 eq. 5, the response to selection in the presence of IGEs is not simply  $\sigma_H^2$  multiplied by  
671 selection. Neighbourhoods or groups made up of unrelated individuals, small group sizes,  
672 and a near-zero or negative covariance between DGEs and IGEs will also cause the  $\sigma_H^2$  to  
673 be somewhat discounted when calculating the response. However, given their prevalence  
674 among livestock (Ellen et al. 2014), IGEs may well influence the response to selection more  
675 broadly, hence they need to be considered more often when attempting to predict the  
676 microevolution of populations, and to explain phenomena such as evolutionary stasis (Merilä  
677 et al. 2001; Ellen et al. 2014; McAdam et al. 2014). This is true even in populations of wild  
678 animals that do not live in clearly defined groups, but in an irregular network of territories  
679 (see also Nunney (1985) for related work on the evolution of altruism in "continuous arrays"  
680 of animals).

681

682 *Altering competition indices and neighbourhood size*

683 Varying the intensity of association factors (i.e. how strongly we weighted neighbours at  
684 different distances) and the size of the neighbourhood did alter the balance between the

685 estimated direct and indirect effects, as well as estimated relative contribution of genetic and  
686 environmental influences (see Tables S1-2 in the supplementary materials). Weighting the  
687 closest individuals more strongly, by only including the 1-3 nearest neighbours, or using the  
688 inverse of distance or distance<sup>2</sup>, or by only including individuals within 60 m, gave similar  
689 results. In all these versions, the variance arising from DGEs increased marginally compared  
690 to the model where all neighbours were weighted equally. This effect was more pronounced  
691 when using the inverse of distance<sup>2</sup> to define the intensity of association factors. We note  
692 that the standard errors of estimates for direct additive genetic variance ( $V_{AD}$ ) in the model  
693 using the inverse of distance<sup>2</sup> were greatly increased, causing the estimate to be within two  
694 standard errors of zero (i.e. nominally non-significant). This was the only model explored  
695 where this occurred. Weighting farther individuals as strongly as close individuals, either by  
696 not including any intensity of association factors for the 6 closest individuals, or by including  
697 all individuals within 200 m and weighting them equally, gave very low estimates for the  
698 IGEs. This could suggest that individuals at greater distances do not influence their  
699 neighbours as much as close individuals.

700         Increasing the number of neighbours considered in the analysis beyond six led to  
701 larger estimates for the variance arising from the non-genetic indirect effects ( $V_{PI}$ ). A larger  
702 estimate for the  $V_{PI}$  was also present in the model before the square term was added (not  
703 shown). This suggests the apparent non-genetic influence of neighbours at large spatial  
704 scales, as indicated by  $V_{PI}$ , may be driven by shared environmental factors at the larger  
705 scale causing sets of neighbours to be consistently different from other sets, rather than by  
706 social interactions of the focal individual causing their neighbours to be consistently different.  
707 Decreasing the number of neighbours tended to increase the variance attributed to the DGE,  
708 while IGEs showed a non-linear trend, peaking in magnitude with 4 neighbours and then  
709 falling back down towards zero. At these neighbourhood sizes,  $V_{PI}$  was typically estimated  
710 near zero, but grew in size once 5 or more neighbours were considered. Overall, these  
711 results do not indicate that inferences from our model with the six closest neighbours,  
712 weighted by the inverse of distance, are inappropriate for the system.

713         The approach we used, based on the work of Muir (2005) and Cappa and Cantet  
714 (2008) can be applied to organisms in a range of social structures. Due to the relatively  
715 recent increase in usage of techniques such as social network analysis (Krause et al. 2007,  
716 2014; Croft et al. 2008), estimates of pairwise associations within populations of animals  
717 have been made in many systems. These values can be used as the intensity of association  
718 factors, as we used the inverse of distance, to scale indirect effects (Fisher and McAdam  
719 2017). To estimate IGEs, this must be twinned with information on the phenotypes and  
720 relatedness of the individuals in the population. We had a large dataset with good

721 information on phenotypes and relatedness of individuals, yet high uncertainty around  
722 moderately large estimates of IGEs did not distinguish them from zero. The requirement to  
723 phenotype, genotype and assess the social relationships of many individuals within a  
724 population may well limit the range of study systems this approach can be used in (Kruuk  
725 and Wilson 2018). However, with decreases in the cost of tracking technologies and in the  
726 cost of assessing the genetic relatedness of animals (Bérénos et al. 2014), more study  
727 systems will begin to be able to apply this and similar models, increasing the number of  
728 estimates for these difficult-to-estimate quantitative genetic parameters, which could then be  
729 aggregated in a meta-analysis to detect general patterns (Reid 2012), such as that by  
730 Wilson and Réale (2005) for the direct-maternal genetic correlation.

731

## 732 Conclusions

733 Previous to this study, IGEs had only ever been estimated for wild animals in the context of  
734 pairwise (dyadic) social interactions. We extended this to estimate IGEs on a life-history trait  
735 with links to fitness in a population of wild animals that do not interact in discretely defined  
736 groups. We also incorporated varying strengths of closeness of association between  
737 individuals to more accurately represent the heterogeneous and complex nature of social  
738 interactions in the natural world. We found that indirect effects of neighbours were a very  
739 important contributor to parturition dates, especially at high densities, and may have a  
740 heritable component. Predicting selection responses from a model that incorporated IGEs  
741 indicates that they can both slow down (at high population density) and speed up (at low  
742 density) the expected response to selection for earlier parturition dates. This is despite  
743 selection actually being stronger at high densities. However, these patterns are based on  
744 point estimates for genetic parameters that are characterised by high uncertainty and, as  
745 noted, we cannot exclude the possibility that the indirect effects have a non-genetic basis.  
746 Nonetheless, significant indirect phenotypic effects were detected and appear to increase in  
747 importance at high density. This is consistent with competition for limited food resources  
748 being the source of neighbour influences on focal life-history traits. Exactly how this  
749 competition is mediated remains to be determined. The estimation of indirect effects, and  
750 IGEs specifically, should be extended to more systems where densities and resource  
751 availabilities vary (either naturally or artificially) to determine whether the patterns we have  
752 observed are general. While we did not conclusively demonstrate IGEs are present, we think  
753 wider estimation of effect sizes is useful even if power is limiting to make strong inferences in  
754 any single case. The method we have used is flexible enough to be applied to alternative  
755 systems, hence we look forward to the accumulation of more estimates of IGEs in the wild to  
756 detect general patterns.

757

## 758 Acknowledgements

759 We thank Agnes MacDonald for long-term access to her trapline, and to the Champagne  
760 and Aishihik First Nations for allowing us to conduct work on their land. We thank all the  
761 volunteers, field assistants and graduate students whose tireless work makes the KRSP  
762 possible. We thank Bill Szkotnicki and Piter Bijma and assistance with the analyses. We  
763 have no conflicts of interest.

764

## 765 Author contributions

766 AGM, AJW, and DNF conceived of the research question. SB initiated the long-term study  
767 and all authors contributed to field logistics, data collection and the writing of the manuscript.  
768 DNF drafted the manuscript and conducted the data analysis, with guidance from AJW and  
769 AGM. All authors approved of the final manuscript for submission.

770

## 771 Funding statement

772 Funding for this study was provided by the Natural Sciences and Engineering Research  
773 Council, the Northern Scientific Training Program, the National Science Foundation, and the  
774 Ontario Ministry of Research and Innovation

775

## 776 References

- 777 Alemu, S. W., P. Bijma, S. H. Møller, L. Janss, and P. Berg. 2014. Indirect genetic effects  
778 contribute substantially to heritable variation in aggression-related traits in group-  
779 housed mink (*Neovison vison*). *Genet. Sel. Evol.* 46:30. BioMed Central Ltd.
- 780 Béréanos, C., P. A. Ellis, J. G. Pilkington, and J. M. Pemberton. 2014. Estimating quantitative  
781 genetic parameters in wild populations: a comparison of pedigree and genomic  
782 approaches. *Mol. Ecol.* 23:3434–51. Wiley-Blackwell.
- 783 Bijma, P. 2011. A General Definition of the Heritable Variation That Determines the Potential  
784 of a Population to evolve. *Genetics* 189:1347–1359.
- 785 Bijma, P. 2010a. Estimating indirect genetic effects: precision of estimates and optimum  
786 designs. *Genetics* 186:1013–28.
- 787 Bijma, P. 2010b. Multilevel selection 4: Modeling the relationship of indirect genetic effects  
788 and group size. *Genetics* 186:1029–31. Genetics Society of America.
- 789 Bijma, P., and M. J. Wade. 2008. The joint effects of kin, multilevel selection and indirect  
790 genetic effects on response to genetic selection. *J. Evol. Biol.* 21:1175–88.
- 791 Boutin, S., A. McAdam, and M. Humphries. 2013. Anticipatory reproduction in squirrels can  
792 succeed in the absence of extra food. *New Zeal. J. Zool.* 40:337–339. Taylor & Francis.
- 793 Boutin, S., L. A. Wauters, A. McAdam, M. Humphries, G. Tosi, and A. Dhondt. 2006.  
794 Anticipatory reproduction and population growth in seed predators. *Science* (80-. ).  
795 314:1928–1930.

- 796 Brichette, I., M. I. Reyero, and C. García. 2001. A genetic analysis of intraspecific  
797 competition for growth in mussel cultures. *Aquaculture* 192:155–169.
- 798 Brinker, T., E. D. Ellen, R. F. Veerkamp, and P. Bijma. 2015. Predicting direct and indirect  
799 breeding values for survival time in laying hens using repeated measures. *Genet. Sel.*  
800 *Evol.* 47:75. BioMed Central.
- 801 Brommer, J. E., and K. Rattiste. 2008. “Hidden” reproductive conflict between mates in a  
802 wild bird population. *Evolution* 62:2326–33.
- 803 Cappa, E. P., and R. J. C. Cantet. 2008. Direct and competition additive effects in tree  
804 breeding: Bayesian estimation from an individual tree mixed model. *Silvae Genet.*  
805 57:45–56.
- 806 Caro, S. P., A. Charmantier, M. M. Lambrechts, J. Blondel, J. Balthazart, and T. D. Williams.  
807 2009. Local adaptation of timing of reproduction: females are in the driver’s seat. *Funct.*  
808 *Ecol.* 23:172–179. Wiley/Blackwell (10.1111).
- 809 Costa e Silva, J., B. M. Potts, P. Bijma, R. J. Kerr, and D. J. Pilbeam. 2013. Genetic control  
810 of interactions among individuals: Contrasting outcomes of indirect genetic effects  
811 arising from neighbour disease infection and competition in a forest tree. *New Phytol.*  
812 197:631–641.
- 813 Costa e Silva, J., B. M. Potts, A. R. Gilmour, and R. J. Kerr. 2017. Genetic-based  
814 interactions among tree neighbors: identification of the most influential neighbors, and  
815 estimation of correlations among direct and indirect genetic effects for leaf disease and  
816 growth in *Eucalyptus globulus*. *Heredity (Edinb.)*, doi: 10.1038/hdy.2017.25.
- 817 Croft, D. P., R. James, and J. Krause. 2008. *Exploring Animal Social Networks*. Princeton  
818 University Press, Oxford.
- 819 Croft, D. P., J. Krause, and R. James. 2004. Social networks in the guppy (*Poecilia*  
820 *reticulata*). *Proc. Biol. Sci.* 271 Suppl:S516-9.
- 821 Dantzer, B., S. Boutin, M. M. Humphries, and A. G. McAdam. 2012. Behavioral responses of  
822 territorial red squirrels to natural and experimental variation in population density.  
823 *Behav. Ecol. Sociobiol.* 66:865–878.
- 824 Dantzer, B., A. E. M. Newman, R. Boonstra, R. Palme, S. Boutin, M. M. Humphries, and A.  
825 G. McAdam. 2013. Density Triggers Maternal Hormones That Increase Adaptive  
826 Offspring Growth in a Wild Mammal. *Science (80-. )*. 340:1215–1217.
- 827 Donald, J. L., and S. Boutin. 2011. Intraspecific cache pilferage by larder-hoarding red  
828 squirrels (*Tamiasciurus hudsonicus*). *J. Mammal.* 92:1013–1020.
- 829 Edwards, L. J., K. E. Muller, R. D. Wolfinger, B. F. Qaqish, and O. Schabenberger. 2008. An  
830 R2 statistic for fixed effects in the linear mixed model. *Stat. Med.* 27:6137–57. NIH  
831 Public Access.
- 832 Ellen, E. D., K. Peeters, M. Verhoeven, R. Gols, J. A. Harvey, M. J. Wade, M. Dicke, and P.  
833 Bijma. 2016. Direct and indirect genetic effects in life-history traits of flour beetles  
834 (*Tribolium castaneum*). *Evolution* 70:207–17.
- 835 Ellen, E. D., T. B. Rodenburg, G. A. A. Albers, J. E. Bolhuis, I. Camerlink, N. Duijvesteijn, E.  
836 F. Knol, W. M. Muir, K. Peeters, I. Reimert, E. Sell-Kubiak, J. A. M. van Arendonk, J.  
837 Visscher, and P. Bijma. 2014. The prospects of selection for social genetic effects to  
838 improve welfare and productivity in livestock. *Front. Genet.* 5:377. Frontiers Research  
839 Foundation.
- 840 Fisher, D. N., S. Boutin, B. Dantzer, M. M. Humphries, J. E. Lane, and A. G. Mcadam. 2017.

- 841 Multilevel and sex-specific selection on competitive traits in North American red  
842 squirrels. *Evolution* (N. Y)., doi: 10.1111/evo.13270.
- 843 Fisher, D. N., and A. G. McAdam. 2017. Social traits, social networks, and evolutionary  
844 biology. *J. Evol. Biol.*
- 845 Fletcher, Q. E., M. Landry-Cuerrier, S. Boutin, A. G. McAdam, J. R. Speakman, and M. M.  
846 Humphries. 2013a. Reproductive timing and reliance on hoarded capital resources by  
847 lactating red squirrels. *Oecologia* 173:1203–1215.
- 848 Fletcher, Q. E., C. Selman, S. Boutin, A. G. McAdam, S. B. Woods, A. Y. Seo, C.  
849 Leeuwenburgh, J. R. Speakman, and M. M. Humphries. 2013b. Oxidative damage  
850 increases with reproductive energy expenditure and is reduced by food-  
851 supplementation. *Evolution* (N. Y). 67:1527–1536.
- 852 Frank, S. A. 2007. All of life is social. *Curr. Biol.* 17:R648–R650.
- 853 Gerhardt, F. 2005. Food pilfering in larder-hoarding red squirrels (*Tamiasciurus hudsonicus*).  
854 *J. Mammal.* 86:108–114.
- 855 Germain, R. R., M. E. Wolak, P. Arcese, S. Losdat, and J. M. Reid. 2016. Direct and indirect  
856 genetic and fine-scale location effects on breeding date in song sparrows. *J. Anim.*  
857 *Ecol.* 85:1613–1624. Wiley/Blackwell (10.1111).
- 858 Gilmour, A. R., B. J. Gogel, B. R. Cullis, S. J. Welham, and R. Thompson. 2015. ASReml  
859 User Guide Release 4.1 Structural Specification.
- 860 Griffing, B. 1967. Selection in reference to biological groups. I. Individual and group selection  
861 applied to populations of unordered groups. *Aust. J. Biol. Sci.* 20:127–39.
- 862 Gunn, M. R., D. A. Dawson, A. Leviston, K. Hartnup, C. S. Davis, C. Strobeck, J. Slate, and  
863 D. W. Coltman. 2005. Isolation of 18 polymorphic microsatellite loci from the North  
864 American red squirrel, *Tamiasciurus hudsonicus* (Sciuridae, Rodentia), and their cross-  
865 utility in other species. *Mol. Ecol. Notes* 5:650–653. Blackwell Science Ltd.
- 866 Hadfield, J. D., and A. J. Wilson. 2007. Multilevel selection 3: Modeling the effects of  
867 interacting individuals as a function of group size. *Genetics* 177:667–668. *Genetics*.
- 868 Houle, D. 1992. Comparing evolvability and variability of quantitative traits. *Genetics* 130.
- 869 Jones, O. R., and J. Wang. 2010. COLONY: a program for parentage and sibship inference  
870 from multilocus genotype data. *Mol. Ecol. Resour.* 10:551–555.
- 871 Kalinowski, S. T., M. L. Taper, and T. C. Marshall. 2007. Revising how the computer  
872 program CERVUS accommodates genotyping error increases success in paternity  
873 assignment. *Mol. Ecol.* 16:1099–1106.
- 874 Kelly, D. 1994. The evolutionary ecology of mast seeding. *Trends Ecol. Evol.* 9:465–470.
- 875 Kenward, M. G., and J. H. Roger. 1997. Small Sample Inference for Fixed Effects from  
876 Restricted Maximum Likelihood. *Biometrics* 53:983.
- 877 Kerr, T. D., S. Boutin, J. M. LaMontagne, A. G. McAdam, and M. M. Humphries. 2007.  
878 Persistent maternal effects on juvenile survival in North American red squirrels. *Biol.*  
879 *Lett.* 3:289–291.
- 880 Khaw, H. L., R. W. Ponzoni, H. Y. Yee, M. A. bin Aziz, and P. Bijma. 2016. Genetic and non-  
881 genetic indirect effects for harvest weight in the GIFT strain of Nile tilapia (*Oreochromis*  
882 *niloticus*). *Aquaculture* 450:154–161.
- 883 Kirkpatrick, M. 2009. Patterns of quantitative genetic variation in multiple dimensions.



- 884           Genetica 136:271–284. Springer Netherlands.
- 885   Kirkpatrick, M., and R. Lande. 1989. The evolution of maternal characters. *Evolution* (N. Y.)  
886           43:485–503.
- 887   Koch, R. M. 1972. The role of maternal effects in animal breeding: VI. Maternal effects in  
888           beef cattle. *J. Anim. Sci.* 35:1316. The American Society of Animal Science.
- 889   Kokko, H., A. Chaturvedi, D. Croll, M. C. Fischer, F. Guillaume, S. Karrenberg, B. Kerr, G.  
890           Rolshausen, and J. Stapley. 2017. Can Evolution Supply What Ecology Demands?  
891           *Trends Ecol. Evol.* 32:187–197.
- 892   Krause, J., D. P. Croft, and R. James. 2007. Social network theory in the behavioural  
893           sciences: potential applications. *Behav. Ecol. Sociobiol.* 62:15–27. Springer-Verlag.
- 894   Krause, J., R. James, D. W. Franks, and D. P. Croft. 2014. *Animal Social Networks*. Oxford  
895           University Press, Oxford.
- 896   Kruuk, L. E. B. 2004. Estimating genetic parameters in natural populations using the  
897           “animal model”. *Philos. Trans. R. Soc. Lond. B. Biol. Sci.* 359:873–90. The  
898           Royal Society.
- 899   Kruuk, L. E. B., and A. J. Wilson. 2018. The challenge of estimating indirect genetic effects  
900           on behavior: A comment on Bailey et al. Oxford University Press.
- 901   Lair, H. 1985. Length of Gestation in the Red Squirrel, *Tamiasciurus hudsonicus*. *J.*  
902           *Mammal.* 66:809–810. Oxford University Press.
- 903   Lair, H. 1990. The calls of the red squirrel — a contextual analysis of function. *Behaviour*  
904           115:254–282.
- 905   Lamontagne, J. M., and S. Boutin. 2007. Local-scale synchrony and variability in mast seed  
906           production patterns of *Picea glauca*. *J. Ecol.* 95:991–1000. Blackwell Publishing Ltd.
- 907   LaMontagne, J. M., C. T. Williams, J. L. Donald, M. M. Humphries, A. G. McAdam, and S.  
908           Boutin. 2013. Linking intraspecific variation in territory size, cone supply, and survival of  
909           North American red squirrels. *J. Mammal.* 94:1048–1058. American Society of  
910           Mammalogists.
- 911   Lande, R. 1979. Quantitative genetic analysis of multivariate evolution , applied to brain  
912           body size allometry. *Evolution* (N. Y.) 33:402–416.
- 913   Lane, J. E., S. Boutin, M. R. Gunn, J. Slate, and D. W. Coltman. 2008. Female multiple  
914           mating and paternity in free-ranging North American red squirrels. *Anim. Behav.*  
915           75:1927–1937.
- 916   Lane, J. E., S. Boutin, M. R. Gunn, J. Slate, and D. W. Coltman. 2007. Genetic relatedness  
917           of mates does not predict patterns of parentage in North American red squirrels. *Anim.*  
918           *Behav.* 74:611–619.
- 919   Lane, J., A. G. McAdam, E. McFarlane, C. Williams, M. M. Humphries, D. Coltman, J.  
920           Gorrell, and S. Boutin. 2018. Phenological shifts in North American red squirrels:  
921           disentangling the roles of phenotypic plasticity and microevolution. *J. Evol. Biol.*, doi:  
922           10.1111/jeb.13263.
- 923   Larivée, M. L., S. Boutin, J. R. Speakman, A. G. McAdam, and M. M. Humphries. 2010.  
924           Associations between over-winter survival and resting metabolic rate in juvenile North  
925           American red squirrels. *Funct. Ecol.* 24:597–607. Blackwell Publishing Ltd.
- 926   Liedvogel, M., C. K. Cornwallis, and B. C. Sheldon. 2012. Integrating candidate gene and

- 927 quantitative genetic approaches to understand variation in timing of breeding in wild tit  
928 populations. *J. Evol. Biol.* 25:813–823.
- 929 Lusseau, D., K. Schneider, O. J. Boisseau, P. Haase, E. Sloaten, and S. M. Dawson. 2003.  
930 The bottlenose dolphin community of Doubtful Sound features a large proportion of  
931 long-lasting associations. *Behav. Ecol. Sociobiol.* 54:396–405.
- 932 María, G. A., K. G. Boldman, and L. D. Van Vleck. 1993. Estimates of variances due to direct  
933 and maternal effects for growth traits of Romanov sheep. *J. Anim. Sci.* 71:845–849.
- 934 McAdam, A. G., and S. Boutin. 2004. Maternal effects and the response to selection in red  
935 squirrels. *Proc. R. Soc. B Biol. Sci.* 271:75–79. The Royal Society.
- 936 McAdam, A. G., S. Boutin, A. K. Sykes, and M. M. Humphries. 2007. Life histories of female  
937 red squirrels and their contributions to population growth and lifetime fitness.  
938 *Ecoscience* 14:362.
- 939 McAdam, A. G., D. Garant, and A. J. Wilson. 2014. The effects of others' genes: maternal  
940 and other indirect genetic effects. P. *in* A. Charmantier, D. Garant, and L. E. B. Kruuk,  
941 eds. *Quantitative Genetics in the Wild*. Oxford University Press.
- 942 McFarlane, S. E., J. C. Gorrell, D. W. Coltman, M. M. Humphries, S. Boutin, and A. G.  
943 McAdam. 2015. The nature of nurture in a wild mammal's fitness. *Proc. R. Soc. B Biol.*  
944 *Sci.* 282:20142422–20142422.
- 945 Merilä, J., B. C. Sheldon, and L. E. Kruuk. 2001. Explaining stasis: microevolutionary studies  
946 in natural populations. *Genetica* 112–113:199–222.
- 947 Moore, A. J., E. D. I. Brodie, and J. B. Wolf. 1997. Interacting phenotypes and the  
948 evolutionary process: I. Direct and indirect genetic effects of social interactions.  
949 *Evolution* (N. Y). 51:1352–1362.
- 950 Muir, W. M. 2005. Incorporation of competitive effects in forest tree or animal breeding  
951 programs. *Genetics* 170:1247–1259.
- 952 Muir, W. M., P. Bijma, and A. Schinckel. 2013. Multilevel selection with kin and non-kin  
953 groups, experimental results with japanese quail (*Coturnix japonica*). *Evolution* (N. Y).  
954 67:1598–1606.
- 955 Nakagawa, S., and H. Schielzeth. 2010. Repeatability for Gaussian and non-Gaussian data:  
956 a practical guide for biologists. *Biol. Rev.* 85:935–956.
- 957 Nunney, L. 1985. Group selection, altruism, and structured-deme models. *Am. Nat.*  
958 126:212–230.
- 959 Piles, M., I. David, J. Ramon, L. Canario, O. Rafel, M. Pascual, M. Ragab, and J. P.  
960 Sánchez. 2017. Interaction of direct and social genetic effects with feeding regime in  
961 growing rabbits. *Genet. Sel. Evol.* 49:58.
- 962 Réale, D., D. Berteaux, A. G. McAdam, and S. Boutin. 2003. Lifetime selection on heritable  
963 life-history traits in a natural population of red squirrels. *Evolution* (N. Y). 57:2416–2423.
- 964 Regan, C. E., J. G. Pilkington, C. Bérénos, J. M. Pemberton, P. T. Smiseth, and A. J.  
965 Wilson. 2016. Accounting for female space sharing in St. Kilda Soay sheep (*Ovis aries*)  
966 results in little change in heritability estimates. *J. Evol. Biol.*, doi: 10.1111/jeb.12990.
- 967 Reid, J. M. 2012. Predicting evolutionary responses to selection on polyandry in the wild:  
968 additive genetic covariances with female extra-pair reproduction. *Proc. R. Soc. B Biol.*  
969 *Sci.* 279:4652–4660.

- 970 Sartori, C., and R. Mantovani. 2013. Indirect genetic effects and the genetic bases of social  
971 dominance: evidence from cattle. *Heredity* (Edinb). 110:3–9. Nature Publishing Group.
- 972 Schielzeth, H. 2010. Simple means to improve the interpretability of regression coefficients.  
973 *Methods Ecol. Evol.* 1:103–113.
- 974 Self, S. G., and K.-Y. Liang. 1987. Asymptotic Properties of Maximum Likelihood Estimators  
975 and Likelihood Ratio Tests Under Nonstandard Conditions. *J. Am. Stat. Assoc.* 82:605.  
976 Taylor & Francis, Ltd.American Statistical Association.
- 977 Shonfield, J. 2010. Territorial defence behaviour and a test of the mechanism of kin  
978 recognition in red squirrels. University of Guelph.
- 979 Shonfield, J., R. W. Taylor, S. Boutin, M. M. Humphries, and A. G. Mcadam. 2012. Territorial  
980 defence behaviour in red squirrels is influenced by local density. *Behaviour* 149:369–  
981 390.
- 982 Silvertown, J. W. 1980. The evolutionary ecology of mast seeding in trees. *Biol. J. Linn. Soc.*  
983 14:235–250.
- 984 Siracusa, E., M. Morandini, S. Boutin, M. M. Humphries, B. Dantzer, J. E. Lane, and A. G.  
985 McAdam. 2017. Red squirrel territorial vocalizations deter intrusions by conspecific  
986 rivals. *Behaviour* 154:1259–1273.
- 987 Smith, C. C. 1978. Structure and function of the vocalizations of tree squirrels  
988 (*Tamiasciurus*). *J. Mammal.* 59:793–808. The Oxford University Press.
- 989 Stopher, K. V, C. A. Walling, A. Morris, F. E. Guinness, T. H. Clutton-Brock, J. M.  
990 Pemberton, and D. H. Nussey. 2012. Shared spatial effects on quantitative genetic  
991 parameters: accounting for spatial autocorrelation and home range overlap reduces  
992 estimates of heritability in wild red deer. *Evolution* 66:2411–26.
- 993 Teplitsky, C., J. A. Mills, J. W. Yarrall, and J. Merilä. 2010. Indirect genetic effects in a sex-  
994 limited trait: The case of breeding time in red-billed gulls. *J. Evol. Biol.* 23:935–944.  
995 Blackwell Publishing Ltd.
- 996 Thomson, C. E., and J. D. Hadfield. 2017. Measuring selection when parents and offspring  
997 interact. *Methods Ecol. Evol.* 8:678–687.
- 998 Thomson, C. E., I. S. Winney, O. Salles, and B. Pujol. 2018. A guide to using a multiple-  
999 matrix animal model to disentangle genetic and nongenetic causes of phenotypic  
1000 variance. bioRxiv 318451. Cold Spring Harbor Laboratory.
- 1001 Wade, M. J. 1976. Group selection among laboratory populations of *Tribolium*. *Proc. Natl.*  
1002 *Acad. Sci.* 73:4604–4607.
- 1003 Williams, C. T., J. E. Lane, M. M. Humphries, A. G. McAdam, and S. Boutin. 2014.  
1004 Reproductive phenology of a food-hoarding mast-seed consumer: Resource- and  
1005 density-dependent benefits of early breeding in red squirrels. *Oecologia* 174:777–788.  
1006 Springer Berlin Heidelberg.
- 1007 Wilson, A. 2014. Competition as a source of constraint on life history evolution in natural  
1008 populations. *Heredity* (Edinb). 112:70–8. The Genetics Society.
- 1009 Wilson, A. J., U. Gelin, M.-C. Perron, and D. Réale. 2009. Indirect genetic effects and the  
1010 evolution of aggression in a vertebrate system. *Proc. R. Soc. B Biol. Sci.* 276:533–41.
- 1011 Wilson, A. J., L. E. B. Kruuk, and D. W. Coltman. 2005. Ontogenetic patterns in heritable  
1012 variation for body size: using random regression models in a wild ungulate population.  
1013 *Am. Nat.* 166:E177-192.

- 1014 Wilson, A. J., M. B. Morrissey, M. J. Adams, C. A. Walling, F. E. Guinness, J. M. Pemberton,  
1015 T. H. Clutton-Brock, and L. E. B. Kruuk. 2011. Indirect genetics effects and evolutionary  
1016 constraint: An analysis of social dominance in red deer, *Cervus elaphus*. *J. Evol. Biol.*  
1017 24:772–783. Blackwell Publishing Ltd.
- 1018 Wilson, A. J., D. Réale, M. N. Clements, M. M. Morrissey, E. Postma, C. a Walling, L. E. B.  
1019 Kruuk, and D. H. Nussey. 2010. An ecologist’s guide to the animal model. *J. Anim.*  
1020 *Ecol.* 79:13–26.
- 1021 Wolf, J. B., E. D. Brodie III, J. M. Cheverud, A. J. Moore, and M. J. Wade. 1998. Evolutionary  
1022 consequences of indirect genetic effects. *Trends Ecol. Evol.* 13:64–69.
- 1023
